# Supplementary material for: Enhanced photocatalytic CO2 conversion over 0D/2D CsPbBr3/BiOCl S-scheme heterojunction via boosting charge separation
Source: Royal Society of Chemistry journal article supplement (doi:10.1039/d4dt02322f), 2024-01-01
Supplement: d4dt02322f1.pdf [file d4dt02322f1.pdf]

## Enhanced photocatalytic CO<sub>2</sub> conversion over 0D/2D CsPbBr<sub>3</sub>/BiOCl S-scheme heterojunction via boosting charge separation

Fangzheng Qi <sup>a</sup>, Zengsheng Guo <sup>a</sup>, Yuhan Zhang <sup>a</sup>, Xue-Na Tang <sup>a</sup>, Yiqiang Sun <sup>a</sup>, Bo Xu <sup>a</sup>,

Guang-Ning Liu\* <sup>a</sup> and Cuncheng Li\* <sup>a, b</sup>

<sup>a</sup> School of Chemistry and Chemical Engineering, University of Jinan, Jinan 250022, P. R. China.

<sup>b</sup> Collaborative Innovation Center of Yellow River Basin Pharmaceutical Green Manufacturing and Engineering Equipment, University of Jinan, Jinan 250022, P. R. China.

### Figure Captions

**Fig. S1.** TEM images (a) and size distribution statistics (b) of BiOCl NSs.

**Fig. S2.** EDS microanalysis spectrum of the CsPbBr<sub>3</sub>/BiOCl heterojunction.

**Fig. S3.** Survey XPS spectra of CsPbBr<sub>3</sub> QDs, BiOCl NSs and the CsPbBr<sub>3</sub>/BiOCl heterojunction.

**Fig. S4.** PL spectra of CsPbBr<sub>3</sub> and CsPbBr<sub>3</sub>/BiOCl heterojunction. Insert: photographs of CsPbBr<sub>3</sub> and CsPbBr<sub>3</sub>/BiOCl heterojunction under light and UV light.

**Fig. S5.** Photocurrent responses of CsPbBr<sub>3</sub>, BiOCl, and CsPbBr<sub>3</sub>/BiOCl heterojunction.

**Fig. S6.** Time courses of (a) CO and (b) CH<sub>4</sub> evolution by the as-prepared samples.

**Fig. S7.** XRD pattern of the recycled CsPbBr<sub>3</sub>/BiOCl heterojunction.

**Fig. S8.** TEM image of the recycled CsPbBr<sub>3</sub>/BiOCl heterojunction.

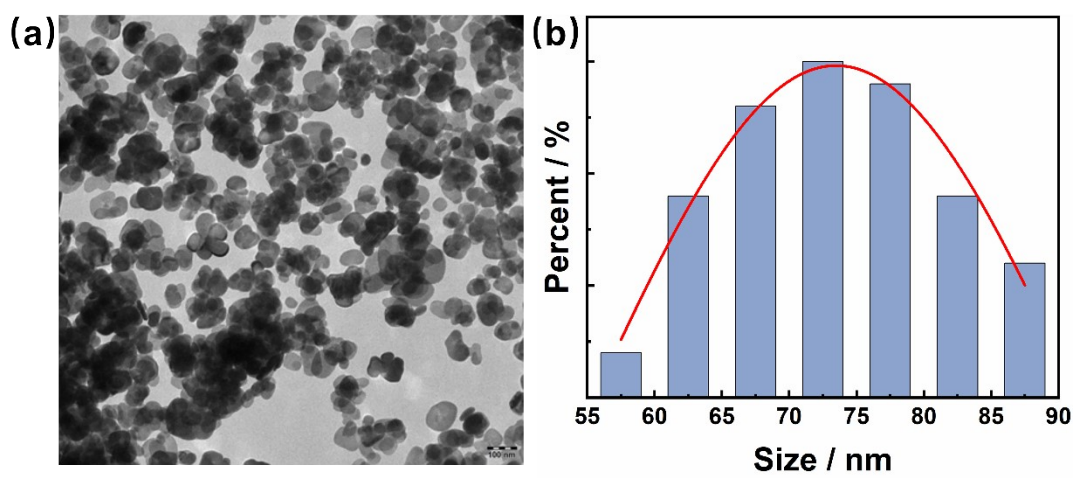

**Fig. S1.** TEM images (a) and size distribution statistics (b) of BiOCl NSs.

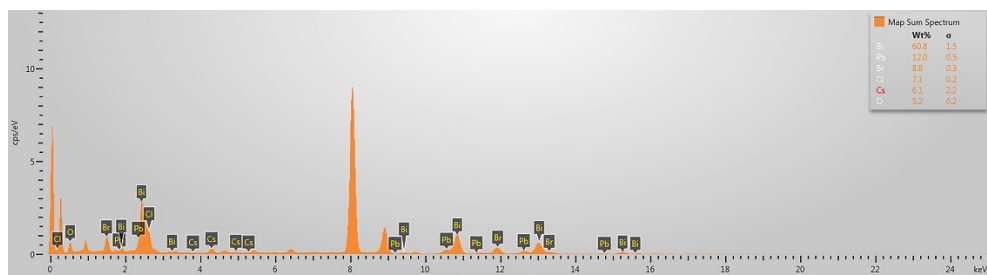

**Fig. S2.** EDS microanalysis spectrum of the CsPbBr<sub>3</sub>/BiOCl heterojunction.

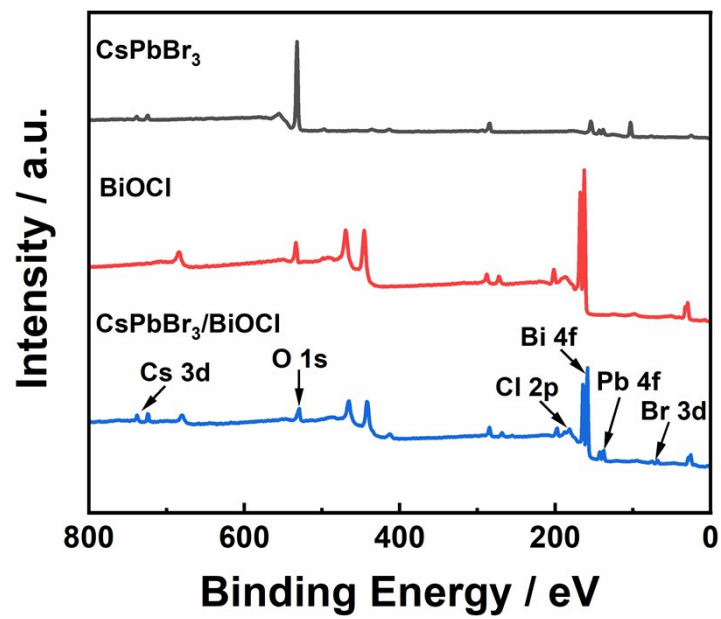

**Figure S3.** Survey XPS spectra of CsPbBr<sub>3</sub> QDs, BiOCl NSs and the CsPbBr<sub>3</sub>/BiOCl heterojunction.

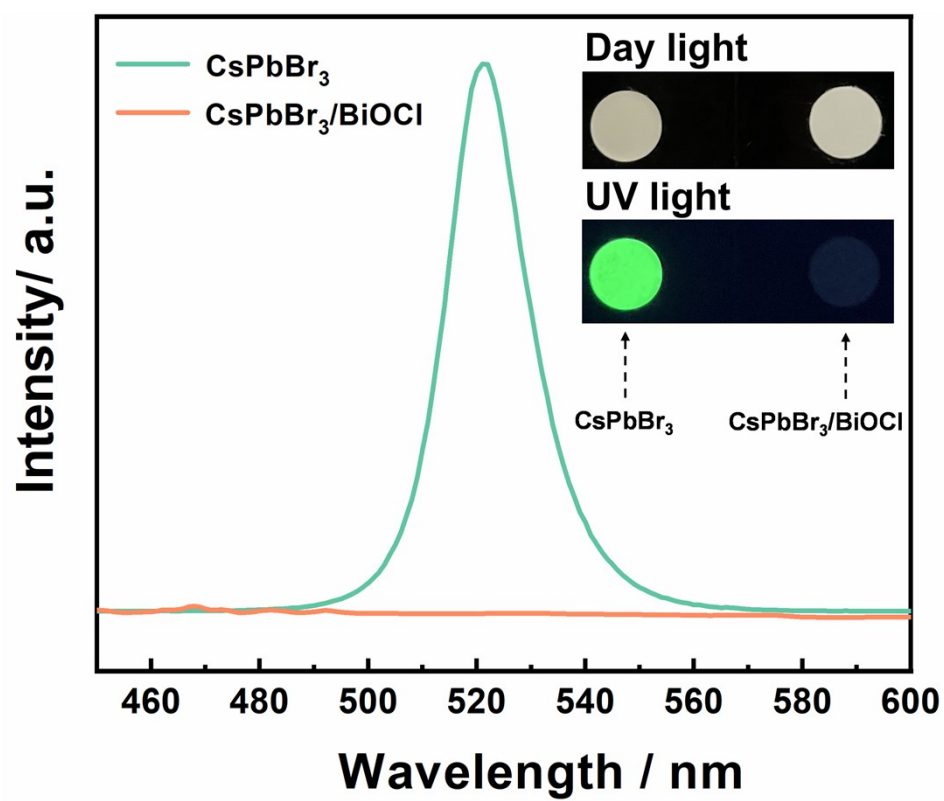

**Fig. S4.** PL spectra of CsPbBr<sub>3</sub> and CsPbBr<sub>3</sub>/BiOCl heterojunction. Insert: photographs of CsPbBr<sub>3</sub> and CsPbBr<sub>3</sub>/BiOCl heterojunction under light and UV light.

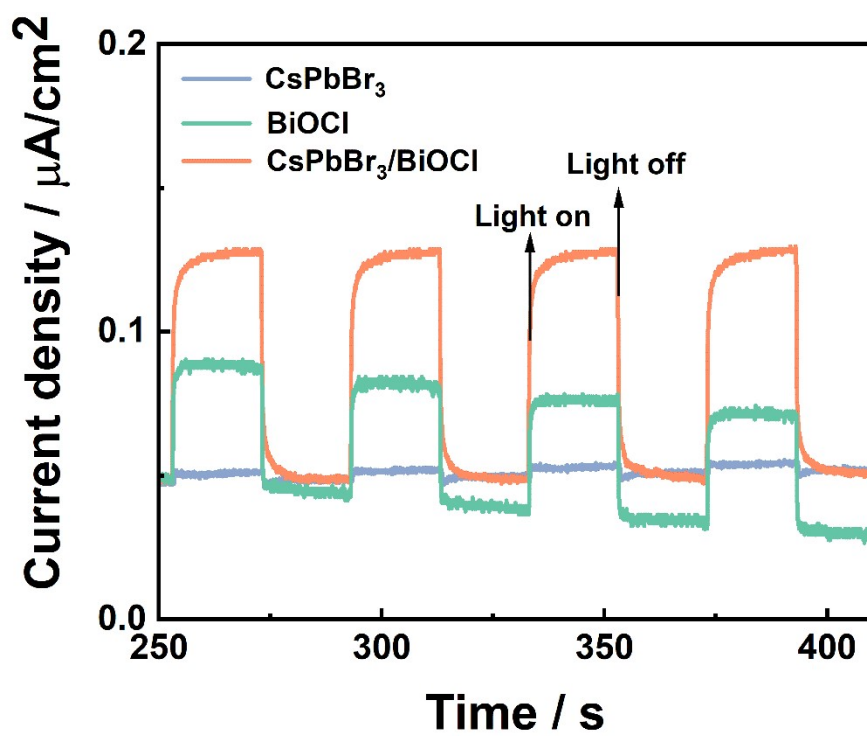

Figure S5. Photocurrent responses of CsPbBr<sub>3</sub>, BiOCl, and CsPbBr<sub>3</sub>/BiOCl heterojunction.

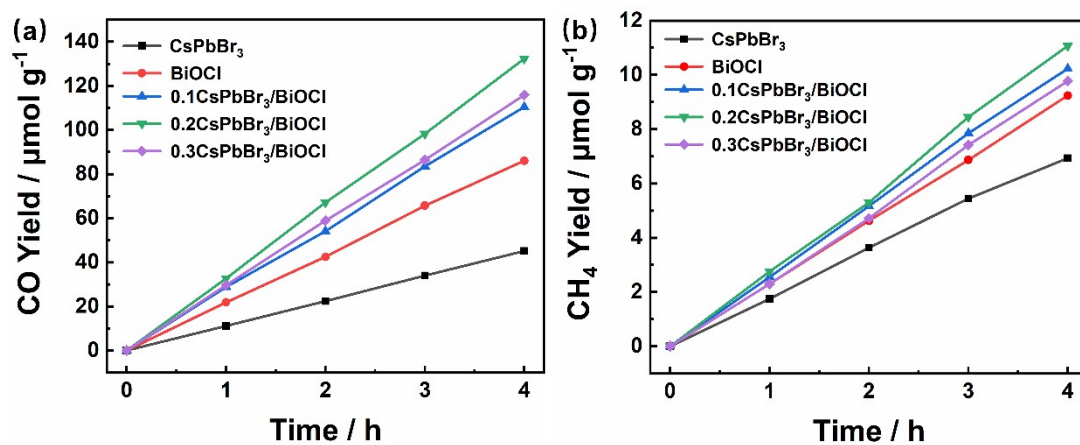

Figure S6. Time courses of (a) CO and (b) CH<sub>4</sub> evolution by the as-prepared samples.

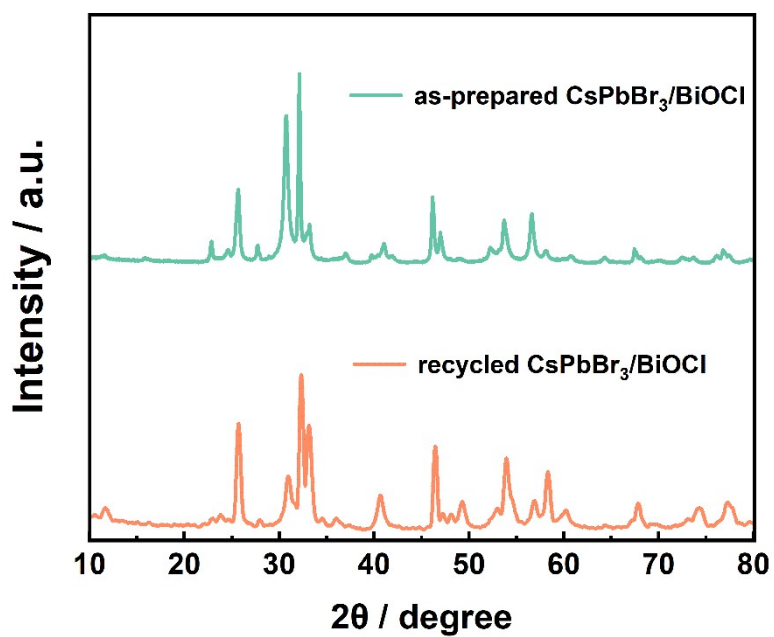

**Figure S7.** XRD pattern of the recycled CsPbBr<sub>3</sub>/BiOCl heterojunction.



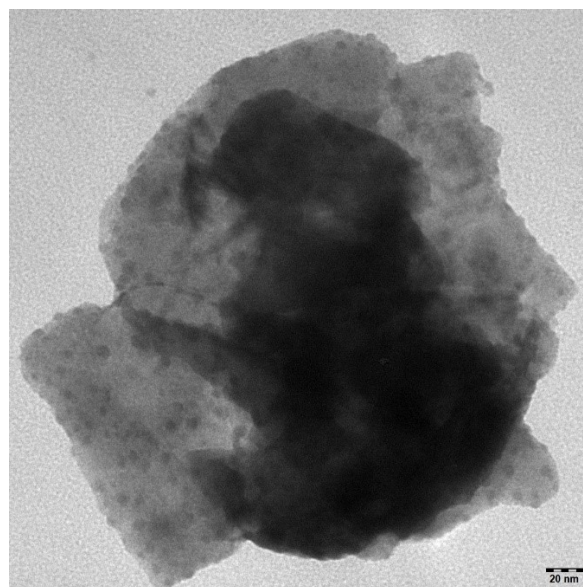

**Figure S8.** TEM image of the recycled CsPbBr<sub>3</sub>/BiOCl heterojunction.
